1  
2  
3  
4  
5  
6  
7  
8  
9  
10  
11  
12  
13  
14  
15  
16  
17  
18  
19  
20  
21  
22  
23  
24  
25  
26  
27  
28  
29  
30  
31  
32  
33  
34  
35  
36  
37  
38  
39

## Sleep Regularity and Mortality: A Prospective Analysis in the UK Biobank

Lachlan Cribb\* (MEpi),<sup>1</sup> Ramon Sha\* (BSc)<sup>1</sup>, Stephanie Yiallourou\* (Ph.D.)<sup>1</sup>, Natalie A Grima (DPsyc),<sup>1</sup>  
Marina Cavuoto (Ph.D.)<sup>1,2</sup>, Andree-Ann Baril<sup>1</sup> (Ph.D.)<sup>3</sup>, Matthew P. Pase<sup>1</sup> (Ph.D.)<sup>1,4</sup>

<sup>1</sup>Turner Institute for Brain and Mental Health, Monash University, Melbourne Australia;

<sup>2</sup>National Ageing Research Institute, Melbourne, Australia;

<sup>3</sup>Douglas Mental Health University Institute, McGill University, Montreal, QC, Canada;

<sup>4</sup>Harvard T.H. Chan School of Public Health, Harvard University, MA, USA.

[\\*Joint first authors](#)

**Correspondence to:** Matthew Pase, 18 Innovation Walk, Room 617, Monash University, Clayton, VIC, Australia, 3800. Phone: (+61)401267924. [email – matthewpase@gmail.com](mailto:matthewpase@gmail.com).

**Word Count:** 2716

40  
41  
42  
43  
44  
45  
46  
47  
48  
49  
50  
51  
52  
53  
54  
55  
56  
57  
58  
59  
60  
61  
62  
63  
64  
65  
66  
67  
68  
69  
70  
71  
72  
73  
74  
75  
76  
77  
78  
79

## ABSTRACT

**Background** Irregular sleep-wake timing may cause circadian disruption leading to several chronic age-related diseases. We examined the relationship between sleep regularity and risk of all-cause, cardiovascular disease (CVD), and cancer mortality in 88,975 participants from the prospective UK Biobank cohort.

**Methods** The sleep regularity index (SRI) was calculated as the probability of an individual being in the same state (asleep or awake) at any two time points 24 hours apart, averaged over 7-days of accelerometry (range 0-100, with 100 being perfectly regular). The SRI was related to the risk of mortality in time-to-event models.

**Findings** The mean sample age was 62 years (SD, 8), 56% were women, and the median SRI was 60 (SD, 10). There were 3010 deaths during a mean follow-up of 7.1 years. Following adjustments for demographic and clinical variables, we identified a non-linear relationship between the SRI and all-cause mortality hazard ( $p$  [global test of spline term]  $< 0.001$ ). Hazard Ratios, relative to the median SRI, were 1.53 (95% confidence interval [CI]: 1.41, 1.66) for participants with SRI at the 5<sup>th</sup> percentile (SRI = 41) and 0.90 (95% CI: 0.81, 1.00) for those with SRI at the 95<sup>th</sup> percentile (SRI = 75), respectively. Findings for CVD mortality and cancer mortality followed a similar pattern.

**Conclusions** Irregular sleep-wake patterns are associated with higher mortality risk.

**Funding** National Health and Medical Research Council of Australia (GTN2009264; GTN1158384), National Institute on Aging (AG062531), Alzheimer's Association (2018-AARG-591358), and the Banting Fellowship Program (#454104).

80

## INTRODUCTION

81 Circadian rhythms are endogenous cycles in physiological, hormonal, and behavioral processes largely  
82 synchronized to the external 24-hour light-dark cycle. The sleep-wake cycle is perhaps the most notable  
83 biological process that follows the 24-hour circadian rhythm.<sup>1</sup> The timing of light exposure is the primary  
84 external driver of circadian rhythms. Therefore, rapid changes in sleep timing can cause circadian misalignment  
85 through fluctuating light-dark exposure.<sup>2</sup>

86

87 Circadian misalignment is associated with several age-related diseases, including cancer and cardiovascular  
88 disease (CVD).<sup>3-5</sup> However, the health impacts of irregular sleep wake timing are still emerging. This remains an  
89 important area of study since modern societal and lifestyle trends, including exposure to artificial and blue light  
90 at night, longer work hours, shift work, and the 24-7 lifestyle have blurred the distinction between day and  
91 night, increasing the propensity for circadian disruption.<sup>6</sup> The present study assessed the relationship between  
92 sleep regularity and the risk of incident all-cause mortality, cancer mortality, and CVD mortality in the UK  
93 Biobank (UKB). We measured sleep regularity via accelerometry to calculate the sleep regularity index (SRI), a  
94 new metric sensitive to differences in sleep-wake timing on a circadian timescale.

95

96

## METHODS

### *Participants*

98 Over 500,000 adults aged 40 to 69 years were recruited to the UKB cohort between 2006 and 2010 across 22  
99 assessment centers. Participants were invited by the UK National Health Service patient registers, resulting in a  
100 5.5% participation rate. Respondents were more likely to be older, female, and less likely to live in  
101 socioeconomically deprived areas than the general population.<sup>7</sup> Baseline demographics, medical history,  
102 lifestyle, vitals, and blood samples were collected. A total of 106,053 participants completed a 7-day wrist-worn  
103 accelerometer study through random selection between February 2013 and December 2015.

104

### *Measurement of sleep regularity*

106 Accelerometry data were collected using a wrist-worn device (Axivity AX3, United Kingdom) over a 7-  
107 day/night period. Estimated sleep status (awake or asleep) at a given time was calculated using the open-source  
108 R package GGIR version 2.7-1,<sup>8</sup> using available algorithms.<sup>9,10</sup> Accelerometry data of low quality were  
109 removed using established UKB criteria (Appendix 1, pg. 3). In total, 88,975 (84%) participants provided valid  
110 SRI data and were included in the study.

111

112 The SRI captures the probability of a participant being in the same state (asleep or awake) at any two time  
113 points 24 hours apart.<sup>11</sup> An individual who sleeps and wakes at precisely the same time each day would have an  
114 index of 100, whereas an individual who sleeps and wakes at entirely random times would have an index of 0.  
115 Each participant provided  $k-1$  SRI measurements (where  $k$  is the number of valid 24-hour periods), one for each  
116 contiguous two-day pair. These SRI measurements were averaged using a linear mixed effects model with a  
117 random intercept for the participant and fixed effects for the day of the week and daylight savings transition. The  
118 average SRI was standardized over the day of the week and daylight savings transitions, so all SRI results were  
119 comparable.

120

121 *Mortality ascertainment*

122 Mortality occurrence was identified through linkage with NHS Digital for participants from England and Wales  
123 and the NHS Central Register for participants from Scotland, with complete records available until January  
124 2022. Death records included the date of death and the ICD-10 code for the primary cause. ICD-10 codes I00-  
125 I99 and C00-C97 defined CVD and cancer mortality, respectively.

126

127 *Ascertainment of prevalent disease at baseline*

128 Prevalent cancer (ICD-10 codes D00-D09 and D37-D48), diabetes (codes E10-E14), mental and behavioral  
129 disorders (codes F00-F99), nervous system disorders (codes G00-G99), and CVD (codes I00-I99) at the time of  
130 the accelerometry study were ascertained through self-report at the UKB baseline session and through linkage  
131 with hospital inpatient records using the above ICD-10 codes. Linkage with hospital inpatient records was also  
132 used to identify disease occurrence between the UKB baseline session and the time of the accelerometry study.

133

134 *Data Analysis*

135 Data analysis was performed using R version 4.2.1. Cox proportional hazards models were used to examine  
136 associations between the SRI and incident all-cause mortality, CVD mortality, and cancer mortality.  
137 Surveillance for mortality commenced from the time of accelerometry (2013-2015) until the end of follow-up  
138 (January 2022), with a median follow-up time of 7.1 years (Q1, Q3: 6.6, 7.6). Non-events were censored at the  
139 last date they were known to be alive. For CVD and cancer mortality, deaths from competing causes were  
140 censored at the time of death. The SRI and all continuous confounders were modeled with restricted cubic  
141 splines with knots at the 10th, 50th, and 90th percentiles to allow for departures from linearity. Missing data  
142 were infrequent (< 2%) for most confounder variables and were imputed (10 imputations) by predictive mean  
143 matching using the `aregImpute` function of R package *Hmisc*.<sup>12</sup>

144

145 In addition to Cox models, discrete-time hazards models, including an interaction between SRI and time  
146 (aggregated into 3-month intervals and modeled with a restricted cubic spline with knots at the 5<sup>th</sup>, 35<sup>th</sup>, 65<sup>th</sup>, and  
147 95<sup>th</sup> percentiles), were fitted to determine whether Hazard Ratios (HRs) varied over time.<sup>13</sup> Time-varying HRs  
148 were then displayed visually. In cases where HRs showed clear time-variation (i.e., hazards were non-  
149 proportional), we nonetheless present HRs from the Cox models as these can be interpreted as a weighted  
150 average of the time-varying HRs.<sup>14</sup> The discrete-time hazards model for all-cause mortality was also used to  
151 estimate standardized cumulative incidence (risk) across levels of SRI, with confidence intervals obtained by  
152 bootstrapping.<sup>15</sup> To reduce computation demand, only single imputation was used for the discrete-time hazards  
153 models.

154

155 All models were adjusted for the following variables that were selected using a directed acyclic graph  
156 (Appendix, Figure S1): age, sex, ethnicity (White, Asian, mixed race, Black, or other), Townsend deprivation  
157 index, retirement status (retired vs. all other work arrangements), shift work (shift worker vs. non-shift worker),  
158 sick or disabled (self-reported employment category), household income (ordinal with 5 levels), highest level of

159 education (ordinal with 6 levels), smoking status (current, former, never), smoking (pack years), and use of  
160 sedative, antidepressant, or antipsychotic medication.

161

### 162 *Sensitivity analyses*

163 We fitted a second statistical model to determine whether the observed associations were independent of sleep  
164 time and disruption. Therefore, Model 2 included additional adjustments for overnight sleep duration and wake  
165 after sleep onset (WASO), averaged across accelerometry days (plus primary model covariates). In the second  
166 sensitivity analysis (Model 3), we adjusted for prevalent disease at baseline (cancer, CVD, mental and  
167 behavioural disorders, nervous system disorders, diabetes), in addition to the variables in the primary model.  
168 These variables were included as part of a sensitivity analysis as it is unclear whether they may be mediators or  
169 confounders of the SRI-mortality relationship. Long-standing irregular sleep may lead to prevalent disease at  
170 baseline and influence disease risk factors,<sup>16-19</sup> indicating that prevalent disease variables may play a mediating  
171 role (and consequently should not be adjusted). Conversely, prevalent disease may have effects disruptive to  
172 regular sleep and these variables may therefore confound the SRI-mortality relationship. Disease risk factor  
173 variables body mass index (BMI), moderate and vigorous physical activity (accelerometry-derived), systolic  
174 blood pressure (BP), and use of BP lowering medication, in addition to the variables in Model 3, were included  
175 in a final sensitivity analysis (Model 4), as it is similarly unclear whether they may confound or mediate the  
176 SRI-mortality relationship.

177

### 178 *Comparison of SRI with other regularity measures*

179 Preliminary reports which identified irregular sleep as a potential CVD risk factor measured sleep regularity as  
180 the amount of deviation in sleep patterns from an individual's average (i.e., the standard deviation [SD] of  
181 nocturnal sleep duration and sleep onset time).<sup>20,21</sup> To contrast these SD-based metrics with the SRI, we fitted  
182 independent Cox models (each with primary model covariates) and estimated HRs for all-cause mortality for  
183 each of the three measures. Additionally, we added the SRI to a model containing both SD-based regularity  
184 measures (alongside primary model covariates) to test whether the SRI contained additional mortality risk  
185 information beyond that captured by the two SD metrics.

186

187

188

## RESULTS

189 **Table 1** displays sample characteristics. The final sample size was 88,975. There were 3010 all cause deaths  
190 during a median follow-up of 7.1 years (Q1, Q3: 6.6, 7.6). The most common primary cause of death was  
191 cancer (n = 1701, 57%) followed by CVD (n = 616, 20%).

192

### 193 *SRI and all-cause mortality*

194 We identified a non-linear association between the SRI and all-cause mortality hazard ( $p$  [global test of spline  
195 term] < 0.001) (**Figure 1**). Compared to the sample median (SRI = 61), mortality rates were highest among  
196 those with the most irregular sleep and decreased almost linearly as SRI approached its median, after which the  
197 decrease began to plateau (**Figure 1**). HRs, relative to the median SRI, were 1.53 (95% CI: 1.41, 1.66) for  
198 participants with SRI at the 5<sup>th</sup> percentile (SRI = 41) and 0.90 (95% CI: 0.81, 1.00) for those with SRI at the 95<sup>th</sup>

199 percentile (SRI = 75), respectively. Standardized cumulative incidence curves for all-cause mortality are  
200 displayed for the SRI at the 5<sup>th</sup> percentile, median, and 95<sup>th</sup> percentile in **Figure 2**.

201

202 There was evidence of non-proportionality of hazards across levels of SRI in the discrete-time hazards model ( $p$   
203 [time x SRI interaction] < 0.001). Time-varying HRs for the 5<sup>th</sup> and 95<sup>th</sup> SRI percentiles compared to the median  
204 are displayed in the appendix (Figure S2). For the 5<sup>th</sup> percentile relative to the median, HRs were greatest in the  
205 earliest period of follow-up (HRs > 2), declining until approximately 2.5 years, after which they remained  
206 approximately stable with a HR of around 1.5. There was no clear time variation in the HR for the 95<sup>th</sup>  
207 percentile of SRI vs. the median.

208

#### 209 *CVD-specific mortality*

210 The SRI was associated with CVD-specific mortality in the primary model ( $p$  [global] < 0.001; **Figure 1**). HRs,  
211 relative to the median SRI, were 1.88 (95% CI: 1.61, 2.21) and 0.93 (95% CI: 0.73, 1.20) for the 5<sup>th</sup> and 95<sup>th</sup>  
212 percentiles, respectively. There was no evidence of non-proportional hazards in the discrete-time hazards model  
213 ( $p$  [time x SRI interaction] = 0.57).

214

#### 215 *Cancer-specific mortality*

216 The SRI was associated with cancer mortality in the primary model ( $p$  [global] < 0.001). HRs, relative to the  
217 median SRI, were 1.36 (95% CI: 1.22, 1.53) and 0.89 (95% CI: 0.77, 1.02) for the 5<sup>th</sup> and 95<sup>th</sup> percentiles,  
218 respectively. There was strong evidence of non-proportional hazards in the cancer-mortality discrete-time  
219 hazards model ( $p$  [time x SRI interaction] < 0.001). HRs, for the 5<sup>th</sup> percentile vs. the median, were large at the  
220 beginning of follow-up (HRs > 2) and declined until approximately four years, after which they were small (~  
221 1.05) and compatible with the null (Appendix, Figure S3). There was no indication that HRs for the 95<sup>th</sup> SRI  
222 percentile relative to the median varied over follow-up.

223

#### 224 *Sensitivity analyses*

225 Sensitivity analyses are displayed in the appendix (Figures S4-6). Overall, results were similar and not  
226 meaningfully altered following adjustments for sleep time and WASO (Model 2) or prevalent baseline disease,  
227 including cancer and CVD (Model 3). The SRI remained associated with mortality after further adjustments for  
228 prevalent diseases, BMI, systolic BP, BP treatment, and physical activity (Model 4), though effect sizes were  
229 attenuated. For example, when comparing the 5<sup>th</sup> percentile to the median, HRs were 1.22 (95% CI: 1.07, 1.39)  
230 for all-cause, 1.43 (95% CI: 1.21, 1.69) for CVD, and 1.15 (95% CI: 1.01, 1.29) for cancer mortality.

231

#### 232 *Comparison of SRI with sleep duration SD and sleep onset time SD*

233 **Figure 3** displays HRs, relative to the median, for the SRI, sleep duration SD, and sleep onset time SD. For each  
234 measure, greater sleep irregularity (i.e., lower SRI or higher SD representing more day-to-day variability) was  
235 associated with an increased all-cause mortality rate in independent models (all  $p$  [global] < 0.001). HRs, for  
236 low regularity compared to the median, were largest for the SRI (**Figure 3**). The addition of the SRI to a model  
237 containing both SD metrics (alongside primary model covariates) improved model fit ( $p$  [likelihood ratio test] <

238 0·001). Conversely, the addition of sleep duration SD and sleep onset time SD to a model containing the SRI  
239 (and primary model covariates) did not meaningfully improve model fit ( $p$  [likelihood ratio test] = 0·10).

240

241

242

## DISCUSSION

243 Among 88,975 individuals followed for a median of 7·1 years, there was a non-linear association between sleep  
244 regularity and the risk of mortality; mortality rates were highest in persons with the most irregular sleep and  
245 decreased approximately linearly as sleep regularity approached its median, after which the decrease began to  
246 plateau. Our findings were independent of prevalent illness (including cancer and CVD at baseline), sleep  
247 duration, sleep fragmentation, and other confounding factors. Overall, these data indicate a relationship between  
248 sleep regularity and longevity in a large community-based cohort.

249

250 Physiological processes associated with CVD and cancer are under circadian control. Mutations or deletions to  
251 circadian clock genes such as *CLOCK*, *PER*, and *BMAL1* influence BP, endothelial function, and glucose  
252 homeostasis.<sup>22-25</sup> Both major (e.g., chronic shift work) and minor (e.g., daylight savings transitions) stressors to  
253 the circadian system have been associated with a higher risk of CVD.<sup>3,5</sup> Similarly, circadian misalignment has  
254 also been implicated in the pathogenesis of cancer. For example, circadian clocks are critical to the orchestration  
255 of cell division<sup>26</sup>, and altered clock function can precipitate aberrant cell proliferation<sup>27</sup> as well as growth and  
256 DNA damage in cancer cells.<sup>28</sup> Many systems are under circadian influence, including the sleep-wake cycle, and  
257 less clear has been the extent to which differences in sleep regularity are related to negative health outcomes. We  
258 extend this research by demonstrating that differences in sleep regularity are associated with the risk of mortality  
259 from both CVD and cancer.

260

261 Whereas sleep regularity has not been examined with respect to incident cancer or mortality, the current findings  
262 extend research showing that greater sleep-wake variability, as measured by the SD of sleep onset or duration,  
263 was independently associated with a higher risk of incident CVD in the multi-ethnic study of atherosclerosis but  
264 not the UK Biobank.<sup>20,21</sup> We demonstrate that the SRI contains information about mortality risk beyond that  
265 contained in the SD of sleep duration and onset, whereas the converse was not the case. The SRI may be  
266 superior to the SD-based metrics because the SRI captures rapid changes in sleep patterns across consecutive  
267 days, as compared to the SD-based metrics which only calculate deviation from an individual's average. Rapid  
268 changes in sleep timing have been hypothesised as being principally challenging for the circadian system to  
269 accommodate<sup>11</sup> which may, in turn, produce negative health outcomes.

270

271 We found evidence that hazard rates across levels of SRI were non-proportional (i.e., varied across the follow-  
272 up period) for all-cause and cancer mortality (which accounted for most deaths), though not for CVD mortality.  
273 For cancer mortality, HRs for low SRI compared to the median were largest in the earliest follow-up period and  
274 decreased thereafter. One plausible interpretation of this finding is that irregular sleep may be a manifestation of  
275 the underlying physiological processes of cancer itself or of cancer treatment (i.e., the SRI-cancer mortality  
276 association may be due to reverse causation). However, this thesis is challenged by the fact that associations  
277 between the SRI and cancer mortality remained similar after adjusting for prevalent cancer at baseline. In the

278 case of CVD mortality, no such evidence of a decline in HRs over follow-up time was evident; a potential causal  
279 role of irregular sleep on CVD death cannot be easily ruled out.

280

281 Sleep of insufficient or excessive duration is associated with many adverse health outcomes, including increased  
282 mortality risk.<sup>29</sup> As of 2022, sleep duration was included by the American Heart Association in their Essential  
283 Eight guidelines for CVD prevention.<sup>30</sup> However, sleep is far more complex than its habitual duration and  
284 quality, with sleep regularity receiving comparatively little attention. As sleep-tracking wearables become more  
285 accessible, objective measurement of sleep regularity has the potential for public and clinical use. Much like  
286 sleep duration, replicating the current findings across different samples will be necessary for establishing  
287 population norms and clinical targets.

288

289 Our study is not without limitations. Firstly, the study was observational. We are, therefore, unable to establish  
290 cause and effect. Although we performed extensive analyses to control for confounding, we cannot exclude the  
291 possibility that our results are explained by residual confounding. As such, although therapies exist for  
292 improving sleep regularity, it's not clear if these interventions are able to extend the lifespan. Second, sleep and  
293 wake were estimated through activity patterns from accelerometry. As compared to polysomnography, there is  
294 the potential to misclassify sleep and wake, although accelerometry is more suited to estimate circadian patterns  
295 over several days; there are several strengths to using accelerometry (e.g., days of continuous recording,  
296 minimal technical apparatus affecting sleep quality), making it the recommended clinical tool for assessing  
297 circadian rhythms.<sup>31</sup>

298

299 Circadian rhythms have a major influence on health and disease. Although sleep wake timing is under circadian  
300 control, research on sleep regularity as a risk factor for mortality was equivocal. These data suggest sleep  
301 regularity as an important correlate of longevity, independent of sleep duration, fragmentation, and quality.  
302 Future work is needed to determine the underlying mechanisms to inform possible interventions to extend the  
303 lifespan.

304

305

#### FUNDING

306 Dr. Pase is supported by a National Health and Medical Research Council of Australia Investigator Grant  
307 (GTN2009264) with sleep research funding from the National Health and Medical Research Council of  
308 Australia (GTN1158384), National Institute on Aging (R01 AG062531) and Alzheimer's Association (2018-  
309 AARG-591358). Dr. Baril is funded by the Banting Fellowship Program (#454104). The funders of the study  
310 had no role in study design, data collection, data analysis, data interpretation, or writing of the report.

311

312

313

#### ACKNOWLEDGMENTS

314 This research has been conducted using the UK Biobank Resource.

315

316

#### DATA SHARING

317 Data from the UK Biobank are available, pending application approval from: <https://www.ukbiobank.ac.uk/>



318

## REFERENCES

- 319 1. Zee PC, Vitiello MV. Circadian Rhythm Sleep Disorder: Irregular Sleep Wake  
320 Rhythm Type. *Sleep Med Clin* 2009; **4**(2): 213-8.
- 321 2. Zeitzer JM, Dijk DJ, Kronauer R, Brown E, Czeisler C. Sensitivity of the human  
322 circadian pacemaker to nocturnal light: melatonin phase resetting and suppression. *J Physiol*  
323 2000; **526 Pt 3**(Pt 3): 695-702.
- 324 3. Torquati L, Mielke GI, Brown WJ, Kolbe-Alexander T. Shift work and the risk of  
325 cardiovascular disease. A systematic review and meta-analysis including dose-response  
326 relationship. *Scand J Work Environ Health* 2018; **44**(3): 229-38.
- 327 4. International-Agency-for-Research-on-Cancer. Painting, firefighting, and shiftwork.  
328 *IARC Monographs on the Evaluation of Carcinogenic Risks to Humans* 2010; **98**: 804.
- 329 5. Janszky I, Ljung R. Shifts to and from Daylight Saving Time and Incidence of  
330 Myocardial Infarction. *New England Journal of Medicine* 2008; **359**(18): 1966-8.
- 331 6. Walker WH, Walton JC, DeVries AC, Nelson RJ. Circadian rhythm disruption and  
332 mental health. *Translational Psychiatry* 2020; **10**(1): 28.
- 333 7. Fry A, Littlejohns TJ, Sudlow C, et al. Comparison of Sociodemographic and Health-  
334 Related Characteristics of UK Biobank Participants With Those of the General Population.  
335 *Am J Epidemiol* 2017; **186**(9): 1026-34.
- 336 8. Migueles JH, Rowlands AV, Huber F, Sabia S, van Hees VT. GGIR: a research  
337 community-driven open source R package for generating physical activity and sleep  
338 outcomes from multi-day raw accelerometer data. *Journal for the Measurement of Physical*  
339 *Behaviour* 2019; **2**(3): 188-96.
- 340 9. Van Hees VT, Sabia S, Anderson KN, et al. A novel, open access method to assess  
341 sleep duration using a wrist-worn accelerometer. *PloS one* 2015; **10**(11): e0142533.
- 342 10. van Hees VT, Sabia S, Jones SE, et al. Estimating sleep parameters using an  
343 accelerometer without sleep diary. *Scientific reports* 2018; **8**(1): 1-11.
- 344 11. Phillips AJ, Clerx WM, O'Brien CS, et al. Irregular sleep/wake patterns are associated  
345 with poorer academic performance and delayed circadian and sleep/wake timing. *Scientific*  
346 *reports* 2017; **7**(1): 1-13.
- 347 12. Harrell Jr FE, Harrell Jr MFE. Package 'hmisc'. *CRAN2018* 2019; **2019**: 235-6.
- 348 13. Singer JD, Willett JB. Applied Longitudinal Data Analysis: Modeling Change and  
349 Event Occurrence: Oxford University Press; 2003.
- 350 14. Stensrud MJ, Hernán MA. Why Test for Proportional Hazards? *JAMA* 2020; **323**(14):  
351 1401-2.
- 352 15. Hernán MA, Robins JM. Causal inference. CRC Boca Raton, FL; 2010.
- 353 16. Fritz J, Phillips AJK, Hunt L, et al. Cross-sectional and prospective associations  
354 between sleep regularity and metabolic health in the Hispanic community Health Study/Study  
355 of Latinos. *Sleep* 2021; **44**(4): zsa218.
- 356 17. Huang T, Redline S. Cross-sectional and prospective associations of actigraphy-  
357 assessed sleep regularity with metabolic abnormalities: the multi-ethnic study of  
358 atherosclerosis. *Diabetes care* 2019; **42**(8): 1422-9.
- 359 18. Huang W-C, Chang S-H, Hsueh M-C, Liao Y. Relationship of sleep regularity with  
360 device-based sedentary behavior time and physical activity time in working adults. *Sleep*  
361 *Health* 2022.
- 362 19. Zuraikat FM, Makarem N, Redline S, Aggarwal B, Jelic S, St-Onge M-P. Sleep  
363 regularity and cardiometabolic health: is variability in sleep patterns a risk factor for excess  
364 adiposity and glycemic dysregulation? *Current diabetes reports* 2020; **20**(8): 1-9.
- 365 20. Nikbakhtian S, Reed AB, Obika BD, et al. Accelerometer-derived sleep onset timing  
366 and cardiovascular disease incidence: a UK Biobank cohort study. *European Heart Journal -*  
367 *Digital Health* 2021; **2**(4): 658-66.

- 368 21. Huang T, Mariani S, Redline S. Sleep Irregularity and Risk of Cardiovascular Events:  
369 The Multi-Ethnic Study of Atherosclerosis. *J Am Coll Cardiol* 2020; **75**(9): 991-9.
- 370 22. Viswambharan H, Carvas JM, Antic V, et al. Mutation of the Circadian Clock Gene  
371 *Per2* Alters Vascular Endothelial Function. *Circulation* 2007; **115**(16): 2188-95.
- 372 23. Curtis AM, Cheng Y, Kapoor S, Reilly D, Price TS, Fitzgerald GA. Circadian  
373 variation of blood pressure and the vascular response to asynchronous stress. *Proc Natl Acad*  
374 *Sci U S A* 2007; **104**(9): 3450-5.
- 375 24. Anea CB, Zhang M, Stepp DW, et al. Vascular disease in mice with a dysfunctional  
376 circadian clock. *Circulation* 2009; **119**(11): 1510-7.
- 377 25. Rudic RD, McNamara P, Curtis AM, et al. BMAL1 and CLOCK, two essential  
378 components of the circadian clock, are involved in glucose homeostasis. *PLoS Biol* 2004;  
379 **2**(11): e377.
- 380 26. Reddy AB, Wong GK, O'Neill J, Maywood ES, Hastings MH. Circadian clocks:  
381 neural and peripheral pacemakers that impact upon the cell division cycle. *Mutat Res* 2005;  
382 **574**(1-2): 76-91.
- 383 27. Wang Q, Ao Y, Yang K, Tang H, Chen D. Circadian clock gene *Per2* plays an  
384 important role in cell proliferation, apoptosis and cell cycle progression in human oral  
385 squamous cell carcinoma. *Oncol Rep* 2016; **35**(6): 3387-94.
- 386 28. Gery S, Komatsu N, Baldjyan L, Yu A, Koo D, Koeffler HP. The circadian gene *per1*  
387 plays an important role in cell growth and DNA damage control in human cancer cells. *Mol*  
388 *Cell* 2006; **22**(3): 375-82.
- 389 29. Cappuccio FP, D'Elia L, Strazzullo P, Miller MA. Sleep duration and all-cause  
390 mortality: a systematic review and meta-analysis of prospective studies. *Sleep* 2010; **33**(5):  
391 585-92.
- 392 30. Lloyd-Jones DM, Allen NB, Anderson CAM, et al. Life's Essential 8: Updating and  
393 Enhancing the American Heart Association's Construct of Cardiovascular Health: A  
394 Presidential Advisory From the American Heart Association. *Circulation* 2022; **146**(5): e18-  
395 e43.
- 396 31. Smith MT, McCrae CS, Cheung J, et al. Use of Actigraphy for the Evaluation of Sleep  
397 Disorders and Circadian Rhythm Sleep-Wake Disorders: An American Academy of Sleep  
398 Medicine Systematic Review, Meta-Analysis, and GRADE Assessment. *J Clin Sleep Med*  
399 2018; **14**(7): 1209-30.

400

401

402

403

404

405

406

407 **Table 1:** Sample characteristics (n = 88,975)

| Variable                                                              | Summary              |
|-----------------------------------------------------------------------|----------------------|
| Sex (male), n (%)                                                     | 38,868 (44)          |
| Age (years)                                                           | 61.9 (7.8)           |
| BMI                                                                   | 26.7 (4.5)           |
| Ethnicity, n (%)                                                      |                      |
| Asian                                                                 | 3,423 (4)            |
| Black                                                                 | 342 (0.4)            |
| Mixed race                                                            | 2,513 (3)            |
| White                                                                 | 81,902 (92)          |
| Other                                                                 | 507 (1)              |
| Townsend deprivation index (score units), median (Q1-Q3)              | -2.44 (-3.81, -0.17) |
| Household income* (thousands), n (%)                                  |                      |
| <18                                                                   | 11,784 (15)          |
| 18-30                                                                 | 19,340 (24)          |
| 31-50                                                                 | 22,936 (29)          |
| 51-100                                                                | 19,984 (25)          |
| >100                                                                  | 5,786 (7)            |
| Retired, n (%)                                                        | 27,893 (31)          |
| Shift worker, n (%)                                                   | 3,927 (4)            |
| Smoking status, n (%)                                                 |                      |
| Current                                                               | 6,104 (7)            |
| Former                                                                | 31,910 (36)          |
| Never                                                                 | 50,718 (57)          |
| Sedative medication, n (%)                                            | 781 (<1)             |
| Antidepressant medication, n (%)                                      | 5,145 (6)            |
| Prevalent cancer, n (%)                                               | 11,638 (13)          |
| Prevalent CVD, n (%)                                                  | 36,279 (41)          |
| Prevalent diabetes, n (%)                                             | 3,759 (4)            |
| Prevalent neurological disease, n (%)                                 | 10,793 (12)          |
| Prevalent mental and behavioural disorder, n (%)                      | 8,187 (9)            |
| Average night time sleep duration (hours; actigraphy-derived)         | 6.57 (8.33)          |
| Average night time wake after sleep onset (hours; actigraphy-derived) | 0.79 (0.27)          |
| Sleep duration SD, hours                                              | 1.13 (0.57)          |
| Sleep onset time SD, hours                                            | 1.02 (0.85)          |
| SRI, score units                                                      | 60.1 (10.2)          |

408 Data are mean (SD), unless specified otherwise. \*pounds. SRI = sleep regularity index; CVD = cardiovascular  
409 disease.

410

411

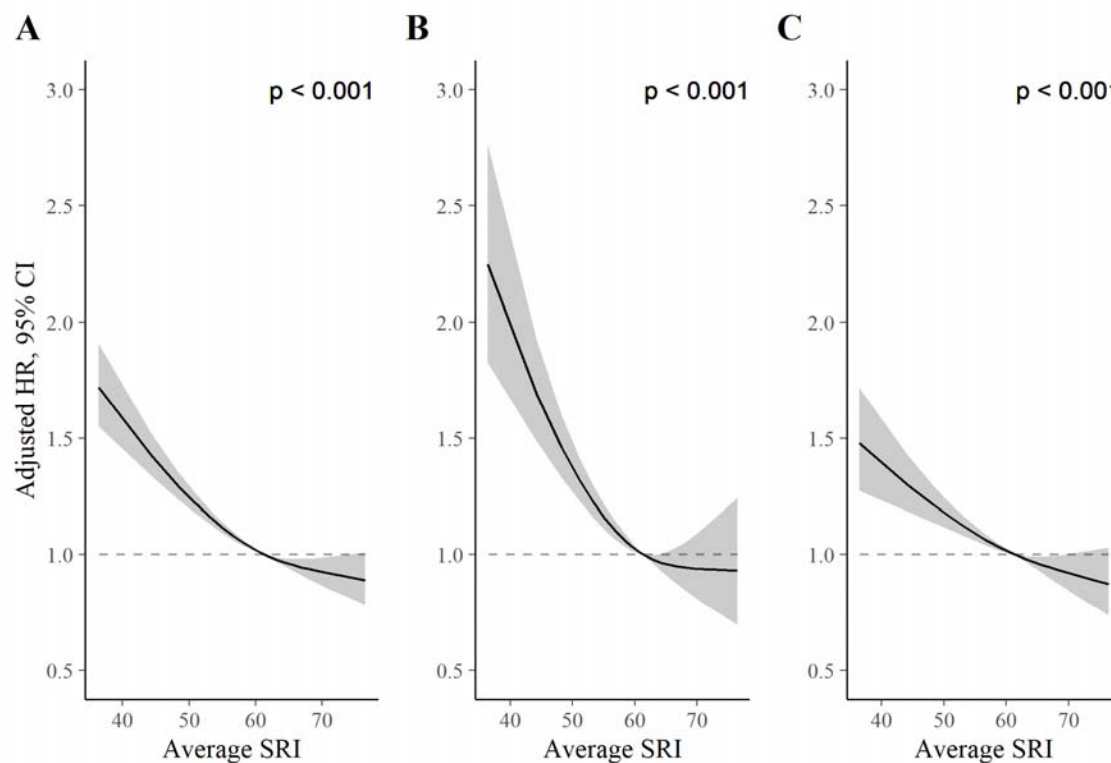

412

413 **Figure 1. Adjusted hazard ratios for all-cause (A), CVD (B), and cancer (C) mortality.**

414 *P* values from global (2 degree of freedom) test of spline term. Hazard ratios (HR) are relative to the median  
415 SRI (SRI = 60). HRs for all-cause mortality, CVD mortality, and cancer mortality were estimated using Cox  
416 proportional hazards models, adjusted for age, Townsend deprivation index, sex, antidepressant, antipsychotic,  
417 and sedative medication, ethnicity, household income, education, smoking status (former, current, never),  
418 smoking pack years, shift work, retirement status, and sick or disabled (self-reported employment category). All  
419 continuous confounders and the SRI were modeled with restricted cubic splines (knots at 10<sup>th</sup>, 50<sup>th</sup>, and 90<sup>th</sup>  
420 percentiles) to allow for departures from linearity.

421

422

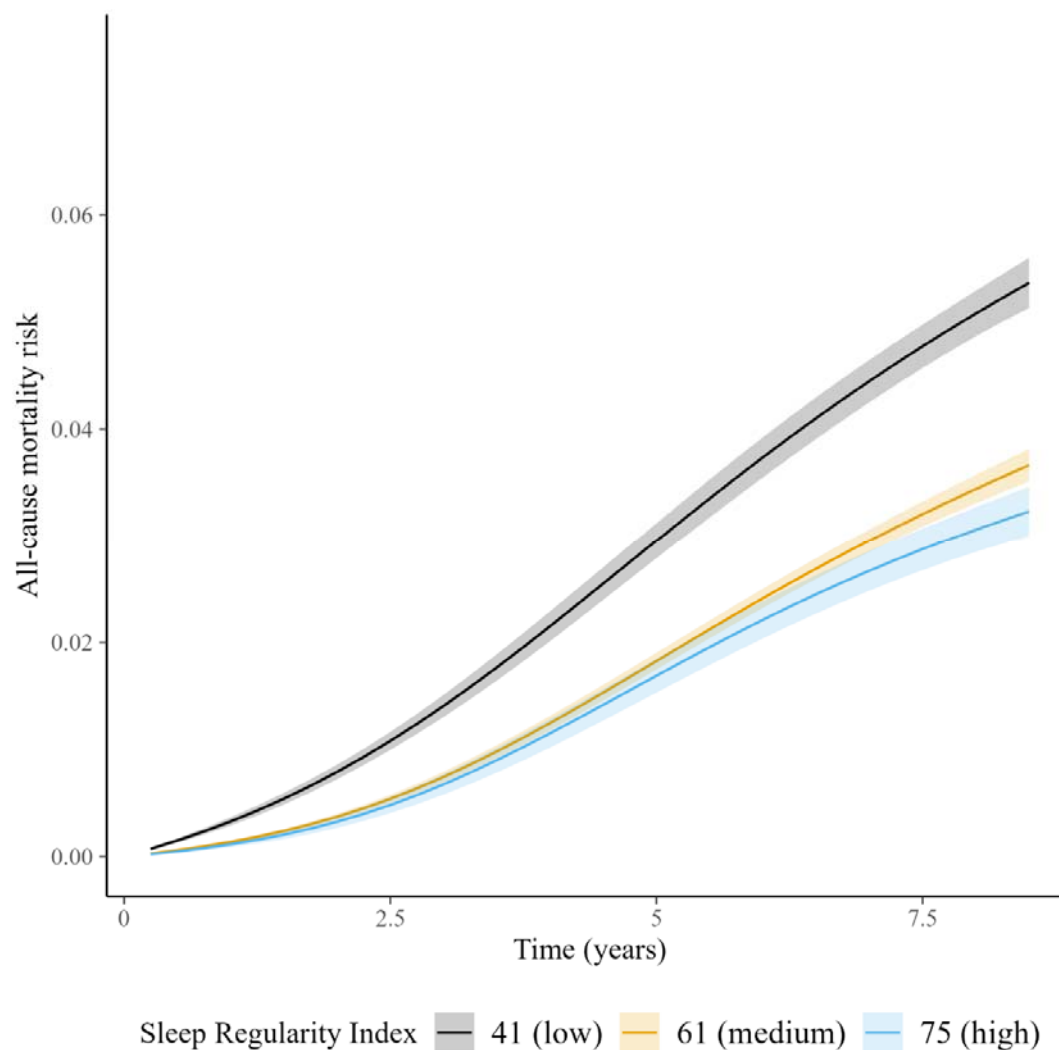

423

424 **Figure 2. Cumulative incidence of all-cause mortality across SRI.**

425 Standardized cumulative incidence of all-cause mortality for SRI at 41 (5<sup>th</sup> percentile), 61 (median), and 75 (95<sup>th</sup>

426 percentile). Estimates from a discrete-time hazards models including an interaction between SRI and time

427 (aggregated into 3-month intervals and modeled with a restricted cubic spline with knots at the 5<sup>th</sup>, 35<sup>th</sup>, 65<sup>th</sup>, and

428 95<sup>th</sup> percentiles) and primary model covariates. Confidence intervals were obtained by bootstrapping.

429

430

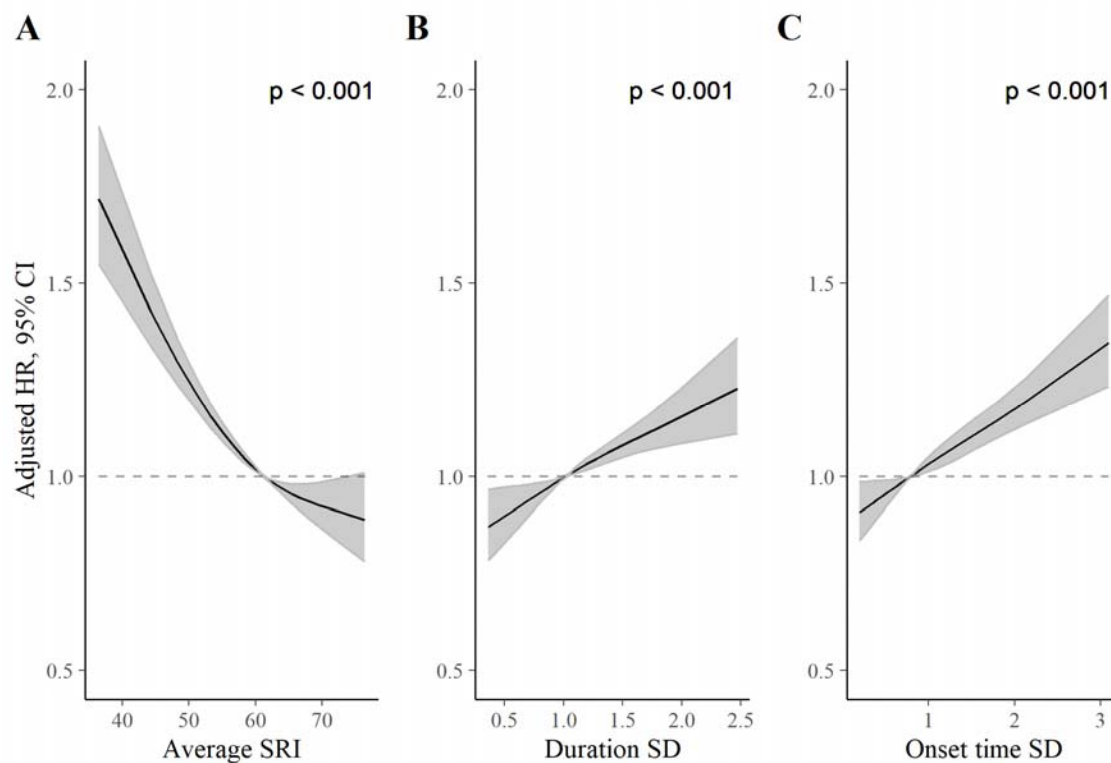

431

432 **Figure 3. Adjusted hazard ratios for all-cause mortality for the SRI (A), sleep duration SD (B), and sleep**  
433 **onset SD (C) measures.**

434 *P* values from global (2 degree of freedom) test of exposure spline term. Hazard ratios (HR) are relative to the  
435 median SRI (SRI = 60). HRs were estimated using Cox proportional hazards models, adjusted for age,  
436 Townsend deprivation index, sex, antidepressant, antipsychotic, and sedative medication, ethnicity, household  
437 income, education, smoking status (former, current, never), smoking pack years, shift work, retirement status,  
438 and sick or disabled (self-reported employment category). All continuous confounders and the sleep regularity  
439 metrics were modeled with restricted cubic splines (knots at 10<sup>th</sup>, 50<sup>th</sup>, and 90<sup>th</sup> percentiles) to allow for  
440 departures from linearity.

441 **Supplementary appendix**

442 Supplement to: Cribb, Sha, Yiallourou, et al. Sleep Regularity and Mortality: A Prospective Analysis in the UK

443 Biobank

444

445

446

447

448

449

450

451

452

453

454

455

456

457

458

459

460

461

462

463

464

465

466

467

468

469

470

471

472

473

474

475

476

477 **Appendix**

478 **Table of Contents**

479 Appendix 1: Removal of low-quality accelerometer data

480 Appendix 2: STROBE checklist

481 Figure S1. Directed acyclic graph for identification of adjustment variables

482 Figure S2. Time-varying HRs for 5<sup>th</sup> and 95<sup>th</sup> percentiles of SRI (relative to median) for all-cause mortality

483 Figure S3. Time-varying HRs for 5<sup>th</sup> and 95<sup>th</sup> percentiles of SRI (relative to median) for cancer-mortality

484 Figure S4. SRI and all-cause mortality in sensitivity analyses

485 Figure S5. SRI and CVD-mortality in sensitivity analyses

486 Figure S6. SRI and cancer-mortality in sensitivity analyses

487

488

489

490

491

492

493

494

495

496

497

498

499

500

501

502

503

504

505

506

507

508

509

510

511

512

513

514

515

516



517 **Appendix 1: Methods. Removal of low-quality accelerometer data**

518 Accelerometry data of low quality were removed using established UKB criteria;  
519 incongruity of self-reported wear time and accelerometer wear time data (5%); insufficient wear time (< 72  
520 hours; 5%); and poorly calibrated data (<1%). Lastly, data were removed for participants in which GGIR was  
521 unable to determine a sleep window (5%) and for participants providing less than two valid SRI measurements  
522 (i.e., 2 24-hour wear periods; <1%). In total, 88,975 (84%) participants provided valid sleep regularity index  
523 data and were included in the study.  
524

525 **Appendix 2: STROBE Statement—Checklist of items that should be included in reports of *cohort studies***

|                              | <b>Item No</b> | <b>Recommendation</b>                                                                                                                                                                                                                                                                                                                                                                                                                                                       |
|------------------------------|----------------|-----------------------------------------------------------------------------------------------------------------------------------------------------------------------------------------------------------------------------------------------------------------------------------------------------------------------------------------------------------------------------------------------------------------------------------------------------------------------------|
| <b>Title and abstract</b>    | 1              | (a) Indicate the study’s design with a commonly used term in the title or the abstract ( <a href="#">see title</a> )<br>(b) Provide in the abstract an informative and balanced summary of what was done and what was found ( <a href="#">see pg 2</a> )                                                                                                                                                                                                                    |
| <b>Introduction</b>          |                |                                                                                                                                                                                                                                                                                                                                                                                                                                                                             |
| Background/rationale         | 2              | Explain the scientific background and rationale for the investigation being reported ( <a href="#">pg 3</a> )                                                                                                                                                                                                                                                                                                                                                               |
| Objectives                   | 3              | State specific objectives, including any prespecified hypotheses ( <a href="#">pg 3</a> )                                                                                                                                                                                                                                                                                                                                                                                   |
| <b>Methods</b>               |                |                                                                                                                                                                                                                                                                                                                                                                                                                                                                             |
| Study design                 | 4              | Present key elements of study design early in the paper ( <a href="#">Pg 3</a> )                                                                                                                                                                                                                                                                                                                                                                                            |
| Setting                      | 5              | Describe the setting, locations, and relevant dates, including periods of recruitment, exposure, follow-up, and data collection ( <a href="#">Pg 3</a> )                                                                                                                                                                                                                                                                                                                    |
| Participants                 | 6              | (a) Give the eligibility criteria, and the sources and methods of selection of participants. Describe methods of follow-up ( <a href="#">Pg 3-4</a> )<br>(b) For matched studies, give matching criteria and number of exposed and unexposed <b>NA</b>                                                                                                                                                                                                                      |
| Variables                    | 7              | Clearly define all outcomes, exposures, predictors, potential confounders, and effect modifiers. Give diagnostic criteria, if applicable ( <a href="#">Pg 4</a> )                                                                                                                                                                                                                                                                                                           |
| Data sources/<br>measurement | 8*             | For each variable of interest, give sources of data and details of methods of assessment (measurement). Describe comparability of assessment methods if there is more than one group ( <a href="#">Pg 3-4</a> )                                                                                                                                                                                                                                                             |
| Bias                         | 9              | Describe any efforts to address potential sources of bias ( <a href="#">pg 5</a> )                                                                                                                                                                                                                                                                                                                                                                                          |
| Study size                   | 10             | Explain how the study size was arrived at ( <a href="#">pg 3 and appendix</a> )                                                                                                                                                                                                                                                                                                                                                                                             |
| Quantitative variables       | 11             | Explain how quantitative variables were handled in the analyses. If applicable, describe which groupings were chosen and why ( <a href="#">pg 5</a> )                                                                                                                                                                                                                                                                                                                       |
| Statistical methods          | 12             | (a) Describe all statistical methods, including those used to control for confounding ( <a href="#">pg 4-5, Figure S1</a> )<br>(b) Describe any methods used to examine subgroups and interactions <b>NA</b><br>(c) Explain how missing data were addressed ( <a href="#">pg 4-5</a> )<br>(d) If applicable, explain how loss to follow-up was addressed<br>(e) Describe any sensitivity analyses ( <a href="#">pg 5</a> )                                                  |
| <b>Results</b>               |                |                                                                                                                                                                                                                                                                                                                                                                                                                                                                             |
| Participants                 | 13*            | (a) Report numbers of individuals at each stage of study—eg numbers potentially eligible, examined for eligibility, confirmed eligible, included in the study, completing follow-up, and analysed ( <a href="#">Pg 3</a> )<br>(b) Give reasons for non-participation at each stage<br>(c) Consider use of a flow diagram <b>Not considered necessary but can be created upon request</b>                                                                                    |
| Descriptive data             | 14*            | (a) Give characteristics of study participants (eg demographic, clinical, social) and information on exposures and potential confounders <b>Table 1</b><br>(b) Indicate number of participants with missing data for each variable of interest<br><b>Missing data were infrequent, as described in methods</b><br>(c) Summarise follow-up time (eg, average and total amount) ( <a href="#">pg 5</a> )                                                                      |
| Outcome data                 | 15*            | Report numbers of outcome events or summary measures over time ( <a href="#">pg 5</a> )                                                                                                                                                                                                                                                                                                                                                                                     |
| Main results                 | 16             | (a) Give unadjusted estimates and, if applicable, confounder-adjusted estimates and their precision (eg, 95% confidence interval). Make clear which confounders were adjusted for and why they were included <b>Figures and Appendix figures</b><br>(b) Report category boundaries when continuous variables were categorized <b>NA</b><br>(c) If relevant, consider translating estimates of relative risk into absolute risk for a meaningful time period <b>Figure 2</b> |

|                          |    |                                                                                                                                                                                   |
|--------------------------|----|-----------------------------------------------------------------------------------------------------------------------------------------------------------------------------------|
| Other analyses           | 17 | Report other analyses done—eg analyses of subgroups and interactions, and sensitivity analyses (pg 6)                                                                             |
| <b>Discussion</b>        |    |                                                                                                                                                                                   |
| Key results              | 18 | Summarise key results with reference to study objectives (pg 7)                                                                                                                   |
| Limitations              | 19 | Discuss limitations of the study, taking into account sources of potential bias or imprecision. Discuss both direction and magnitude of any potential bias (pg 8)                 |
| Interpretation           | 20 | Give a cautious overall interpretation of results considering objectives, limitations, multiplicity of analyses, results from similar studies, and other relevant evidence (pg 8) |
| Generalisability         | 21 | Discuss the generalisability (external validity) of the study results (pg 7-8)                                                                                                    |
| <b>Other information</b> |    |                                                                                                                                                                                   |
| Funding                  | 22 | Give the source of funding and the role of the funders for the present study and, if applicable, for the original study on which the present article is based (pg 8)              |

526

527 \*Give information separately for exposed and unexposed groups.

528

529 **Note:** An Explanation and Elaboration article discusses each checklist item and gives methodological  
530 background and published examples of transparent reporting. The STROBE checklist is best used in conjunction  
531 with this article (freely available on the Web sites of PLoS Medicine at <http://www.plosmedicine.org/>, Annals of  
532 Internal Medicine at <http://www.annals.org/>, and Epidemiology at <http://www.epidem.com/>). Information on the  
533 STROBE Initiative is available at <http://www.strobe-statement.org>.

534

535

536

537

538

539

540

541

542

543

544

545

546

547

548

549

550

551

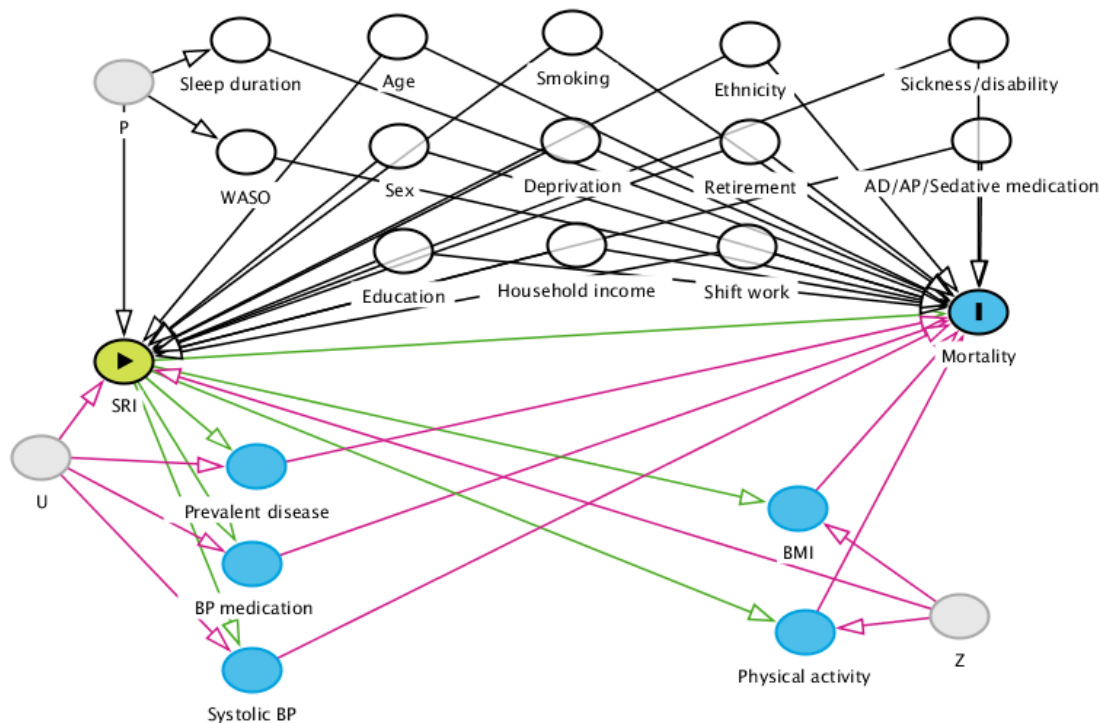

552

553 **Figure S1. Directed acyclic graph for identification of adjustment variables.** The green node indicates the  
 554 exposure variable (*SRI*), and the blue node (*Mortality*) is the outcome variable. Pale grey nodes indicate  
 555 unobserved variables; white nodes indicate a variable which has been conditioned on (by regression adjustment  
 556 or restriction). Paths in red are biasing paths. Arrows indicate the direction of causal effect between two nodes.  
 557 *P* is an unobserved variable representing unmeasured causes of sleep habits (e.g., genetics). *U* is an unobserved  
 558 variable representing unmeasured causes of disease and cardiovascular dysfunction (e.g., genetics, biological  
 559 ageing). *Z* is an unobserved variable representing unmeasured causes of health behaviours (e.g., personality  
 560 factors, genetics). Green paths from *SRI* to *Prevalent disease*, *BP medication*, *Systolic BP*, *BMI*, and *Physical*  
 561 *activity* and from these nodes to *Mortality* represent potential mediation of an *SRI* effect. Conversely, red paths  
 562 indicate potential sources of confounding (e.g., a backdoor path from *Mortality* to *Prevalent disease* to *SRI* via  
 563 *U*). Given the current evidence base, we are unable to determine whether and to what extent variables such as  
 564 *Prevalent disease* act as mediators or confounders (via *U*) of the *SRI*-mortality association; AD = anti-psychotic;  
 565 AD = antidepressant; BMI = body mass index; BP = blood pressure; CVD = cardiovascular disease; Deprivation  
 566 = the Townsend deprivation index; *SRI* = sleep regularity index; WASO = wake after sleep onset.

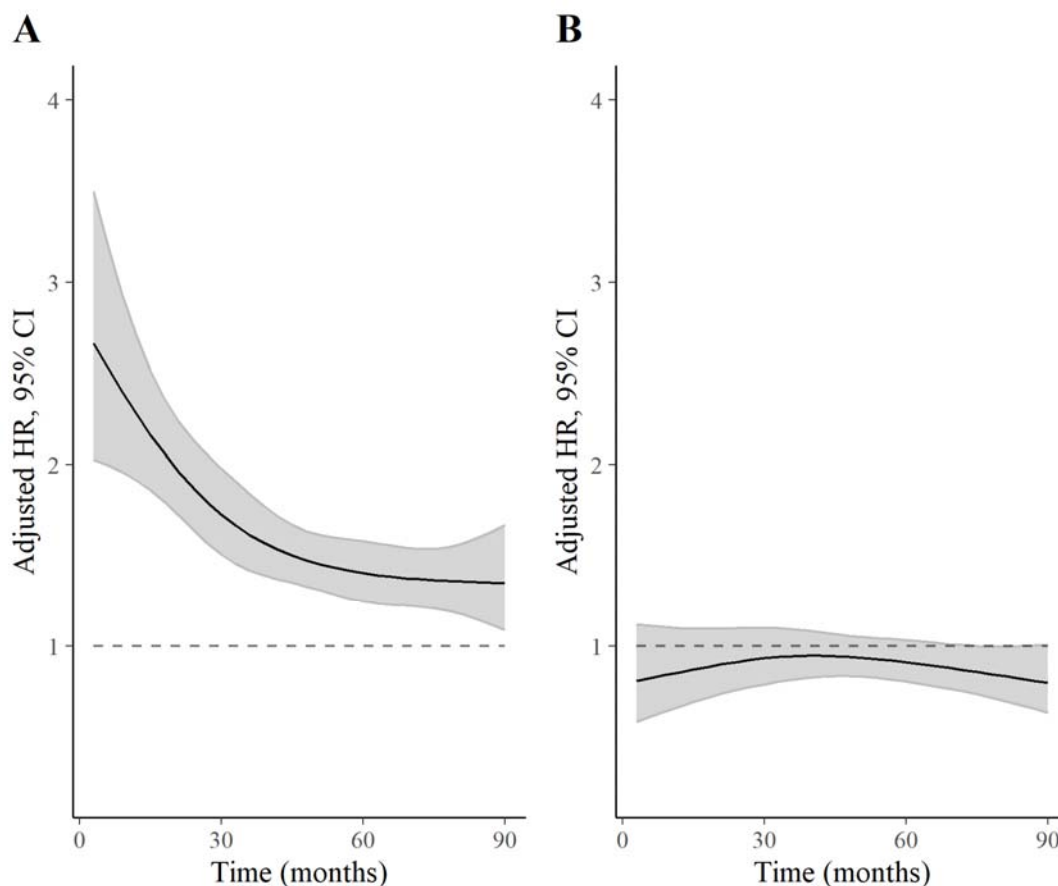

567  
568  
569  
570  
571  
572  
573  
574  
575  
576  
577  
578  
579  
580  
581  
582  
583  
584  
585  
586  
587  
588  
589  
590

**Figure S2. Time-varying HRs for 5<sup>th</sup> and 95<sup>th</sup> percentiles of SRI (relative to median) for all-cause mortality.** **A:** Hazard ratios for 5<sup>th</sup> percentile vs median SRI; **B:** Hazard ratios for 95<sup>th</sup> percentile vs median SRI. Discrete time hazards model including time (aggregated into 3-month intervals and modelled with a restricted cubic spline with knots at the 5<sup>th</sup>, 35<sup>th</sup>, 65<sup>th</sup>, and 95<sup>th</sup> percentiles), SRI, and an SRI by time interaction. Adjusted for age, Townsend deprivation index, sex, antidepressant, antipsychotic, and sedative medication, ethnicity, household income, education, smoking status (former, current, never), smoking pack years, shift work, retirement status, and sick or disabled (self-reported employment category). All continuous confounders and the SRI were modelled with restricted cubic splines (knots at 10<sup>th</sup>, 50<sup>th</sup>, and 90<sup>th</sup> percentiles) to allow for departures from linearity. There was strong evidence of an interaction between time and SRI ( $p$  [interaction] < 0.001).

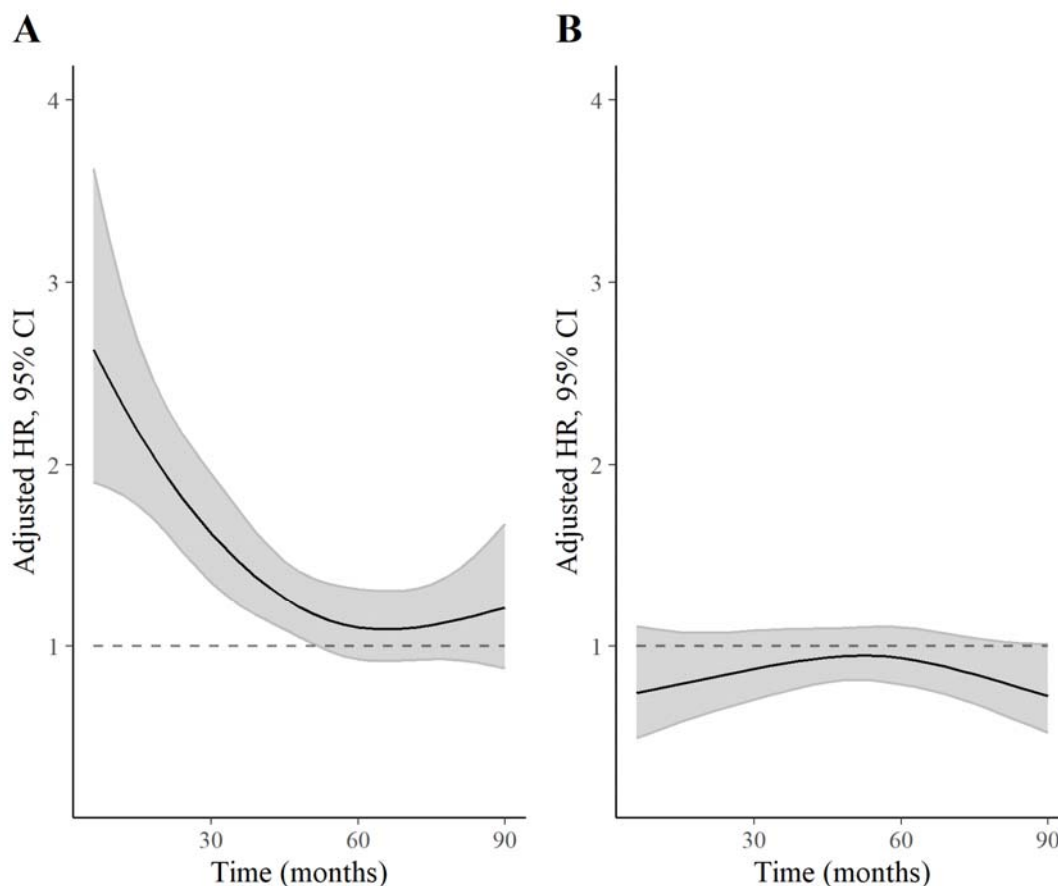

591  
592  
593  
594  
595  
596  
597  
598  
599  
600  
601  
602  
603  
604  
605  
606  
607  
608  
609

**Figure S3. Time-varying HRs for 5<sup>th</sup> and 95<sup>th</sup> percentiles of SRI (relative to median) for cancer-mortality.** **A:** Hazard ratios for 5<sup>th</sup> percentile vs median SRI; **B:** Hazard ratios for 95<sup>th</sup> percentile vs median SRI. Discrete time hazards model including time (aggregated into 3-month intervals and modelled with a restricted cubic spline with knots at the 5<sup>th</sup>, 35<sup>th</sup>, 65<sup>th</sup>, and 95<sup>th</sup> percentiles), SRI, and an SRI by time interaction. Adjusted for age, Townsend deprivation index, sex, antidepressant, antipsychotic, and sedative medication, ethnicity, household income, education, smoking status (former, current, never), smoking pack years, shift work, retirement status, and sick or disabled (self-reported employment category). All continuous confounders and the SRI were modelled with restricted cubic splines (knots at 10<sup>th</sup>, 50<sup>th</sup>, and 90<sup>th</sup> percentiles) to allow for departures from linearity. There was strong evidence of an interaction between time and SRI ( $p$  [interaction] < 0.001).

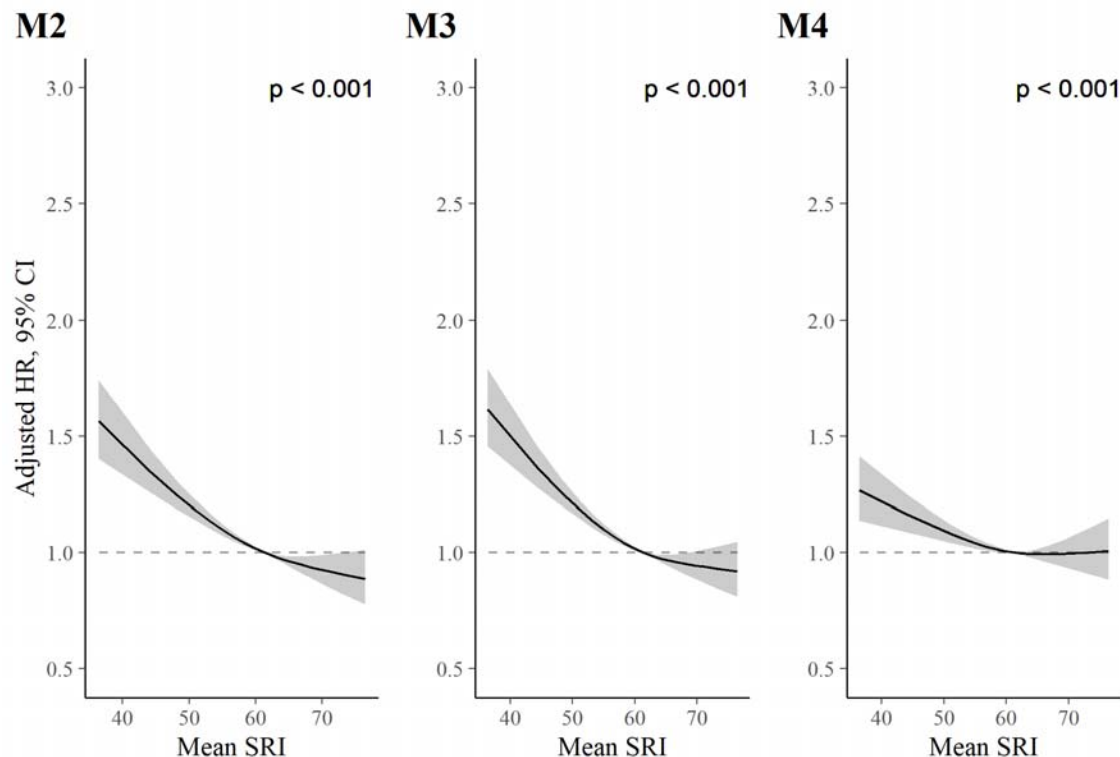

610  
611  
612  
613  
614  
615  
616  
617  
618  
619  
620  
621  
622  
623  
624  
625  
626  
627  
628  
629  
630  
631

**Figure S4. SRI and all-cause mortality in sensitivity analyses.** *P* values from global (2 degree of freedom) test of spline term. Hazard ratios are relative to the median SRI (SRI = 60).

**Model 2 (M2) adjustments:** Adjusted for age, Townsend deprivation index, sex, antidepressant, antipsychotic, and sedative medication, ethnicity, household income, education, smoking status (former, current, never), smoking pack years, shift work, retirement status, and sick or disabled (self-reported employment category), average sleep time, and average wake after sleep onset time. **M2 results:** HRs, relative to the median SRI, were 1.42 (95% CI: 1.31, 1.55) and 0.90 (95% CI: 0.80, 1.00) for SRI at the 5<sup>th</sup> and 95<sup>th</sup> percentiles, respectively.

**Model 3 (M3) adjustments:** Adjusted for age, Townsend deprivation index, sex, antidepressant, antipsychotic, and sedative medication, ethnicity, household income, education, smoking status (former, current, never), smoking pack years, shift work, retirement status, and sick or disabled (self-reported employment category), and prevalent diabetes, cancer, mental and behavioural disorder, neurological illness, and cardiovascular illness. **M3 Results:** HRs, relative to the median SRI, were 1.46 (95% CI: 1.35, 1.58) and 0.93 (95% CI: 0.83, 1.03) for the 5<sup>th</sup> and 95<sup>th</sup> percentiles of SRI, respectively.

**Model 4 (M4) adjustments:** Model 3 with additional adjustment for BMI, moderate and vigorous physical activity, systolic blood pressure, and blood pressure medication. **M4 results:** HRs, relative to the median SRI, were 1.20 (95% CI: 1.11, 1.31) and 1.00 (95% CI: 0.90, 1.12) for the 5<sup>th</sup> and 95<sup>th</sup> percentiles, respectively.

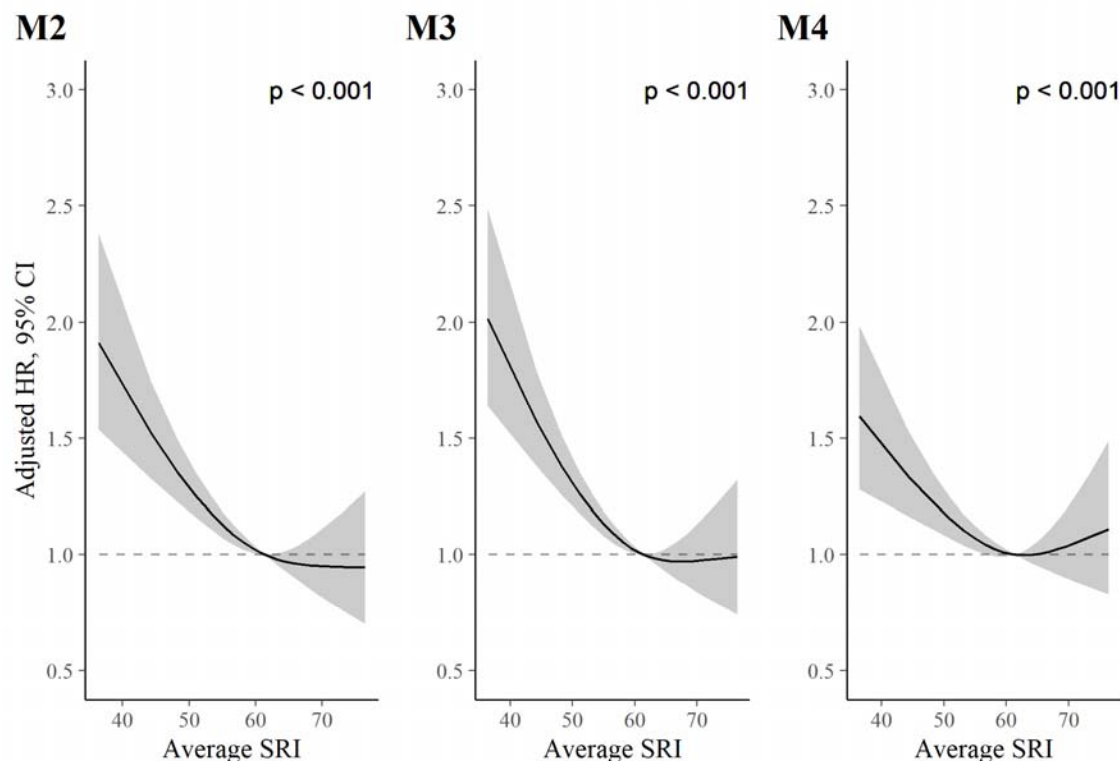

632

633

**Figure S5. SRI and CVD-mortality in sensitivity analyses.** *P* values from global (2 degree of freedom) test of spline term. Hazard ratios are relative to the median SRI (SRI = 60).

634

635

636

**Model 2 (M2) adjustments:** Adjusted for age, Townsend deprivation index, sex, antidepressant, antipsychotic, and sedative medication, ethnicity, household income, education, smoking status (former, current, never), smoking pack years, shift work, retirement status, and sick or disabled (self-reported employment category), average sleep time, and average wake after sleep onset time. **M2 results:** HRs were 1.66 (95% CI: 1.40, 1.96) and 0.95 (95% CI: 0.73, 1.22) for the 5<sup>th</sup> and 95<sup>th</sup> percentile vs. the median SRI, respectively.

640

641

**Model (M3) adjustments:** Adjusted for age, Townsend deprivation index, sex, antidepressant, antipsychotic, and sedative medication, ethnicity, household income, education, smoking status (former, current, never), smoking pack years, shift work, retirement status, and sick or disabled (self-reported employment category), and prevalent diabetes, cancer, mental and behavioural disorder, neurological illness, and cardiovascular illness. **M3 results:** HRs were 1.73 (95% CI: 1.47, 2.02) and 0.99 (95% CI: 0.77, 1.26) for the 5<sup>th</sup> and 95<sup>th</sup> percentiles, respectively.

646

647

**Model 4 (M4) adjustments:** Model 3 with additional adjustment for BMI, moderate and vigorous physical activity, systolic blood pressure, and blood pressure medication. **M4 results:** HRs were somewhat attenuated: 1.43 (95% CI: 1.21, 1.69) and 1.09 (95% CI: 0.85, 1.40), for the 5<sup>th</sup> and 95<sup>th</sup> percentiles, respectively.

649

650

651



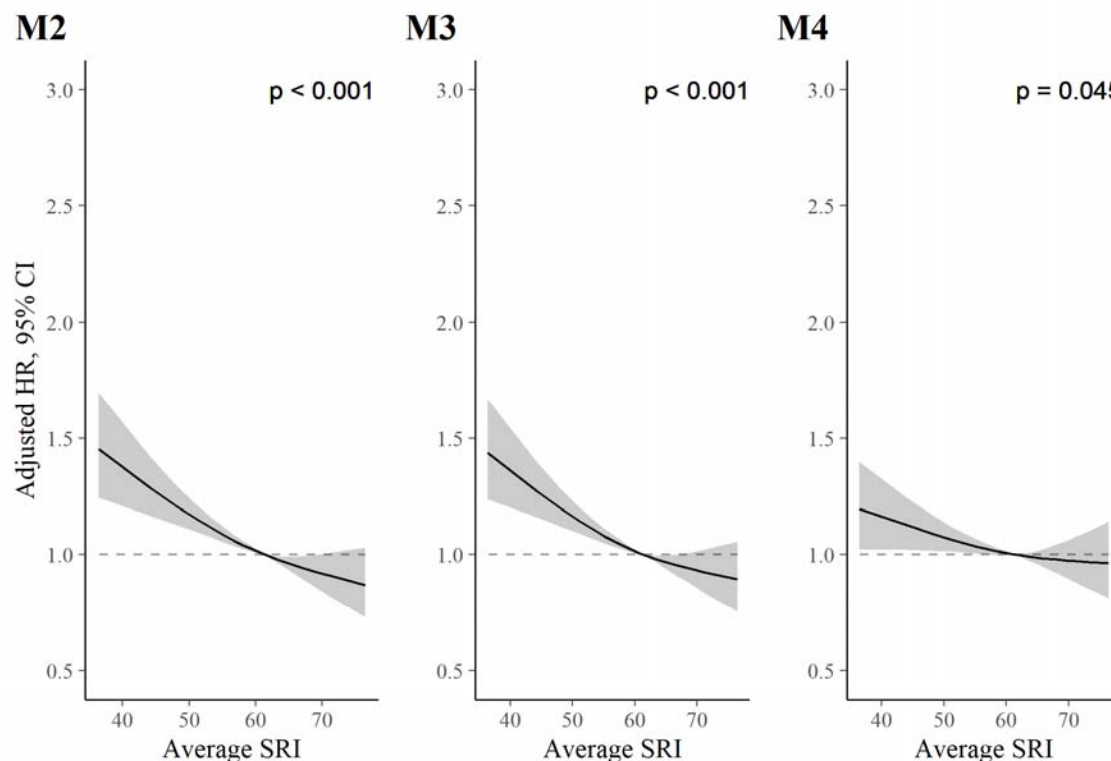

652

653

654

655

656

657

658

659

660

661

662

663

664

665

666

667

668

669

670

671

**Figure S6. SRI and cancer-mortality in sensitivity analyses.** *P* values from global (2 degree of freedom) test of spline term. Hazard ratios are relative to the median SRI (SRI = 60).

**Model 2 (M2) adjustments:** Adjusted for age, Townsend deprivation index, sex, antidepressant, antipsychotic, and sedative medication, ethnicity, household income, education, smoking status (former, current, never), smoking pack years, shift work, retirement status, and sick or disabled (self-reported employment category), average sleep time, and average wake after sleep onset time. **M2 results:** HRs were 1.35 (95% CI: 1.20, 1.52) and 0.88 (95% CI: 0.76, 1.02) for the 5<sup>th</sup> and 95<sup>th</sup> percentile vs. the median SRI, respectively.

**Model 3 (M3) adjustments:** Adjusted for age, Townsend deprivation index, sex, antidepressant, antipsychotic, and sedative medication, ethnicity, household income, education, smoking status (former, current, never), smoking pack years, shift work, retirement status, and sick or disabled (self-reported employment category), and prevalent diabetes, cancer, mental and behavioural disorder, neurological illness, and cardiovascular illness. **M3 results:** HRs were 1.33 (95% CI: 1.19, 1.49) and 0.90 (95% CI: 0.78, 1.04) for the 5<sup>th</sup> and 95<sup>th</sup> percentiles, respectively.

**Model 4 (M4) adjustments:** Model 3 with additional adjustment for BMI, moderate and vigorous physical activity, systolic blood pressure, and blood pressure medication. **M4 results:** HRs were 1.15 (95% CI: 1.02, 1.30) and 0.97 (95% CI: 0.84, 1.12) for the 5<sup>th</sup> and 95<sup>th</sup> percentiles, respectively.
